# Supplementary material for: ZEUS (ZIF-based electrochemical ultrasensitive screening) device for isopentane analytics with focus on lung cancer diagnosis
Source: Royal Society of Chemistry journal article supplement (doi:10.1039/d1ra03093k), 2021-01-01
Supplement: d1ra03093k1.pdf [file d1ra03093k1.pdf]

## Supplementary Information

# **Z.E.U.S (ZIF-based Electrochemical Ultrasensitive Screening) device for Isopentane Analytics with Focus on Lung Cancer Diagnosis**

Ivneet Banga<sup>1</sup>, Anirban Paul<sup>1</sup>, Abha Umesh Sardesai<sup>1</sup>, Sriram Muthukumar<sup>1,2</sup>, and Shalini Prasad<sup>1,2,\*</sup>

<sup>1</sup>Department of Bioengineering, University of Texas at Dallas, Richardson, Texas 75080, USA; ivneetkaur.banga@utdallas.edu (I.B.); anirban.paul@utdallas.edu (A.P.), abha.Sardesai@UTDallas.edu (A.S.)

<sup>2</sup>EnLiSense LLC, 1813 Audubon Pondway, Allen, TX 75013, USA; srirammm@enlisense.com

Correspondence: [shalini.prasad@utdallas.edu](mailto:shalini.prasad@utdallas.edu)

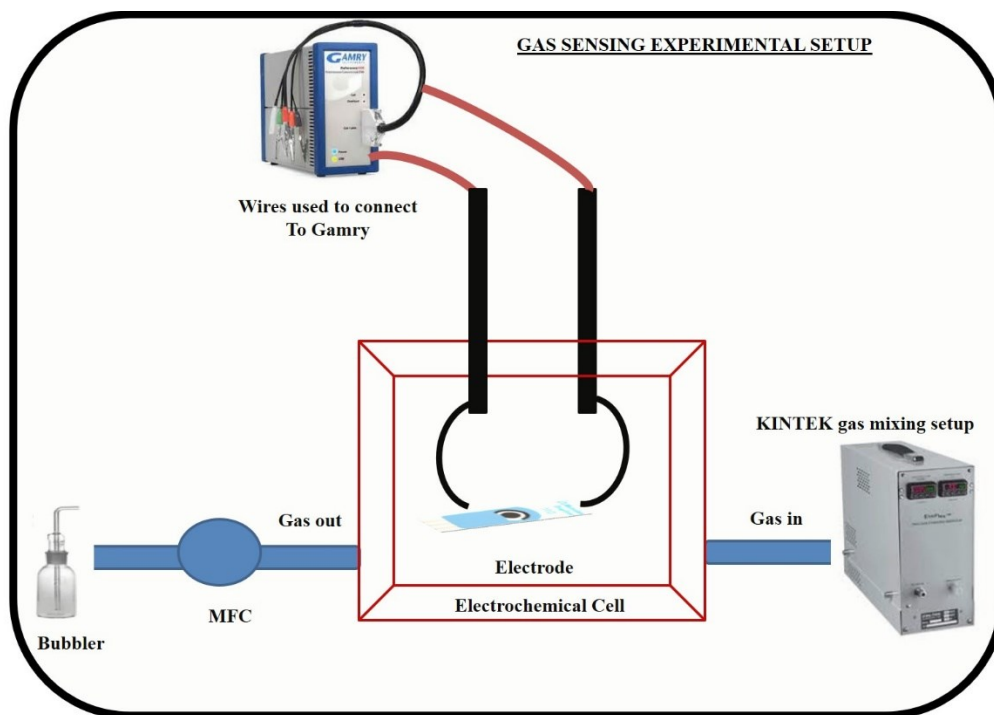

Fig. S1 Schematic representation of the experimental setup used for conducting experiments.

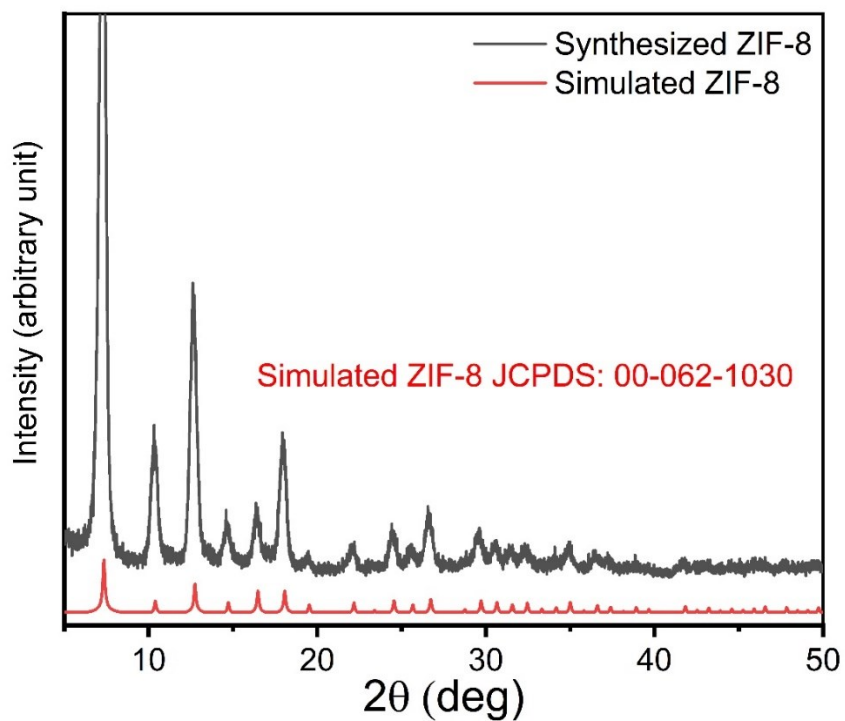

Fig. S2 The standard characteristic peaks of synthesized ZIF-8 is compared with simulated ZIF-8 (JCPDS 00-062-1030;  $a=b=c=17.0116 \text{ \AA}$   $\alpha=\beta=\gamma=90^\circ$ )

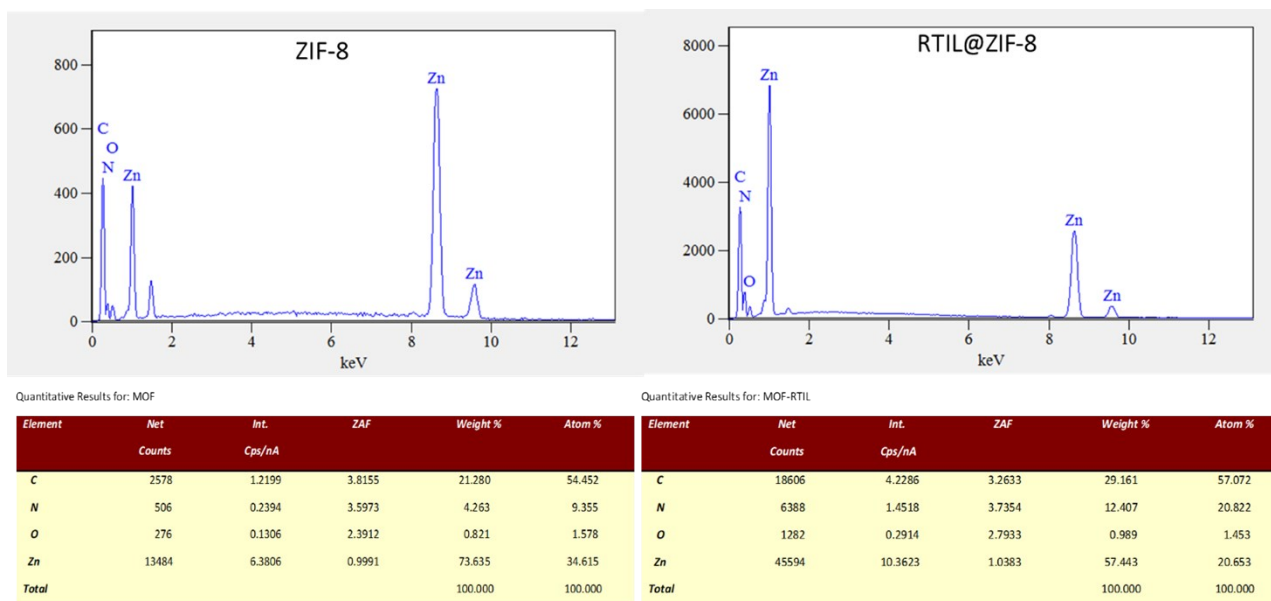

Fig. S3 EDS spectra and elemental composition of ZIF-8 and RTIL@ZIF-8

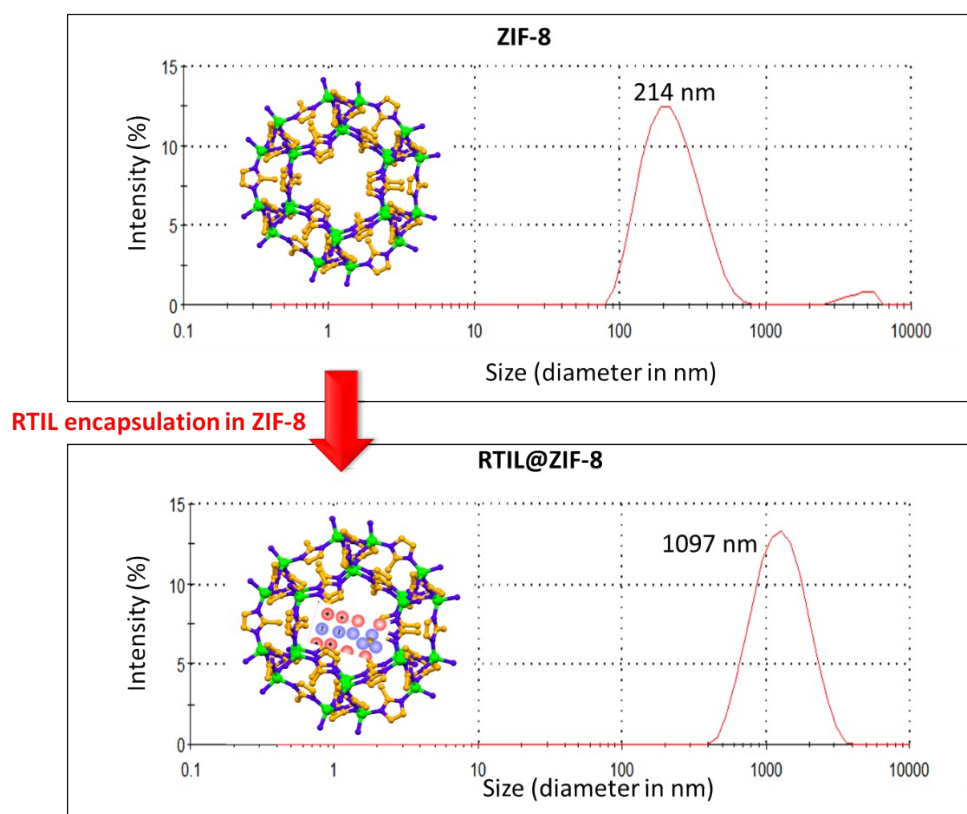

Fig. S4 Size characterization of the synthesized nanocomposite before and after encapsulation of ferrocene.

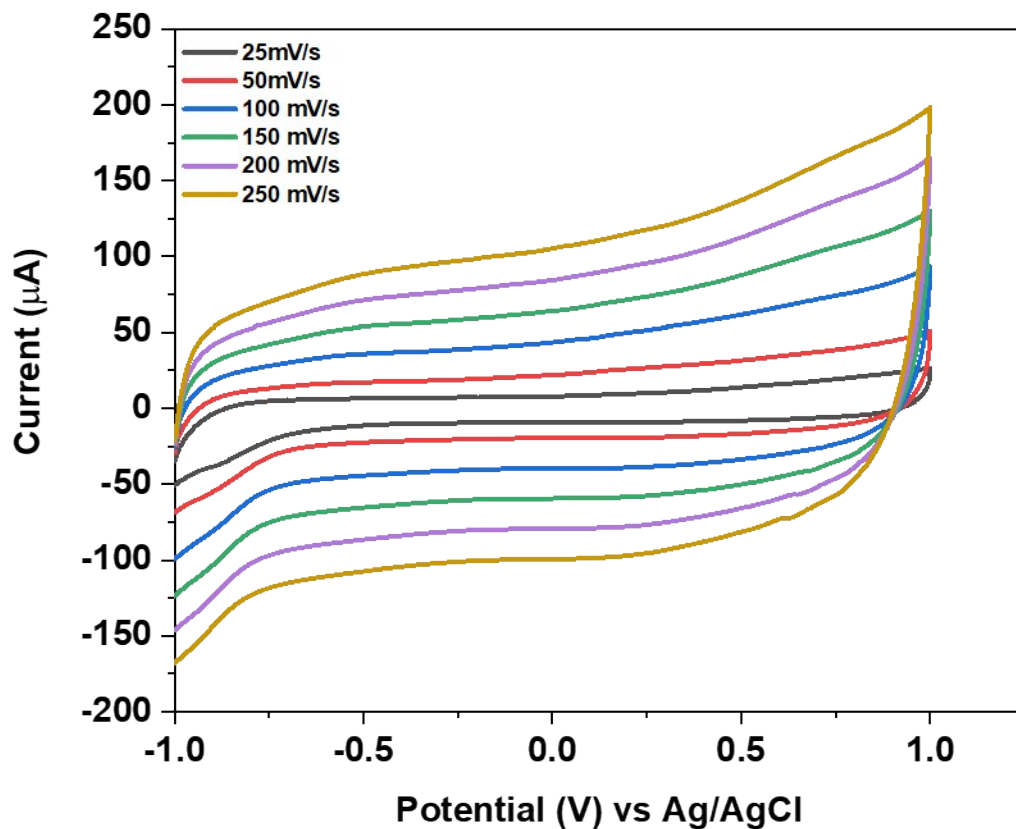

Fig. S5 Cyclic voltammetry (CV) result of modified electrode setup with potential ranging from -1 V to +1V with increasing scan rate from 25 mV/s to 250 mV/s for detection of isopentane at 600 ppb.

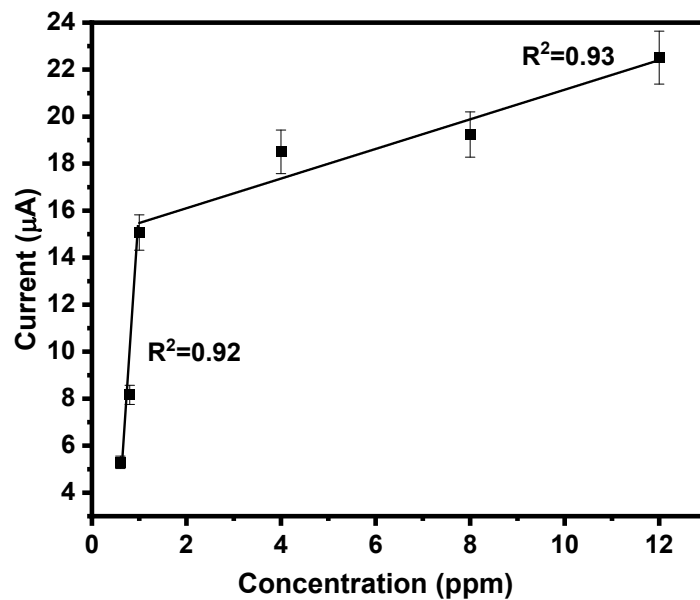

Fig. S6 Linear response fitting of the dose dependent nature of BMIM]BF<sub>4</sub>@ZIF-8 modified electrode for sensing isopentane levels ranging from 0.6 to 12 ppm.

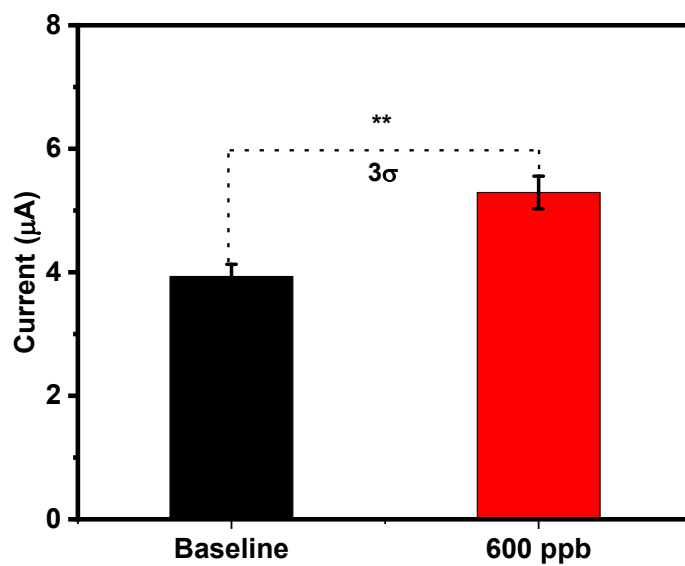

Fig. S7 Limit of detection of 600 ppb has been obtained as the response for target analyte and baseline was  $3\sigma$  higher

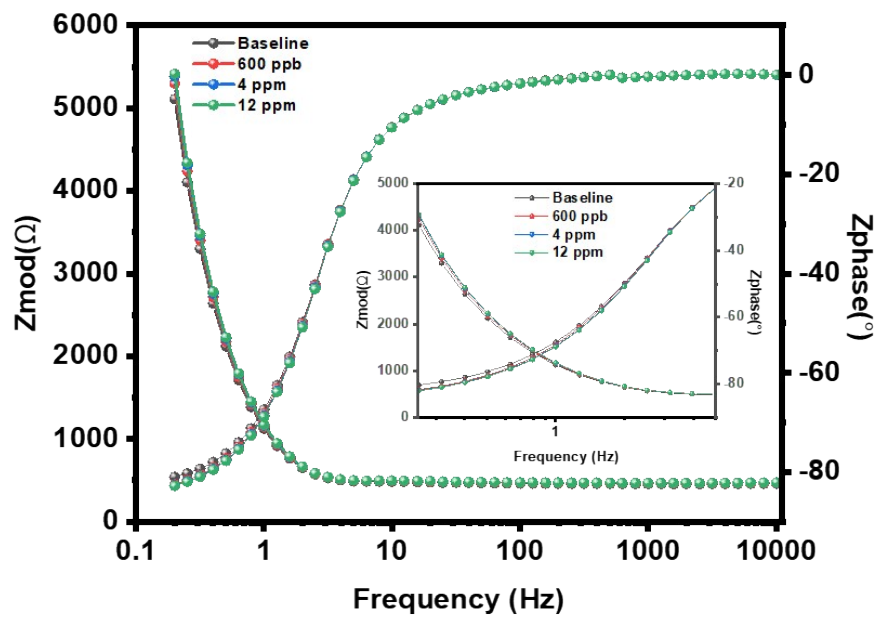

Fig. S8 Bode plots for isopentane detection for low, medium and high concentration.
